# Supplementary material for: Comparative Study of Chemical Stability of a PK20 Opioid–Neurotensin Hybrid Peptide and Its Analogue [Ile9]PK20—The Effect of Isomerism of a Single Amino Acid
Source: MDPI journal article supplement (doi:10.3390/ijms231810839), 2022-09-16
Supplement: s1 [file s1]

**Figure S1.** EIC for PK20 and [Ile<sup>9</sup>]PK20 generated for  $m/z = 1357.40 \pm 0.20$  showing peak of quantified compounds.

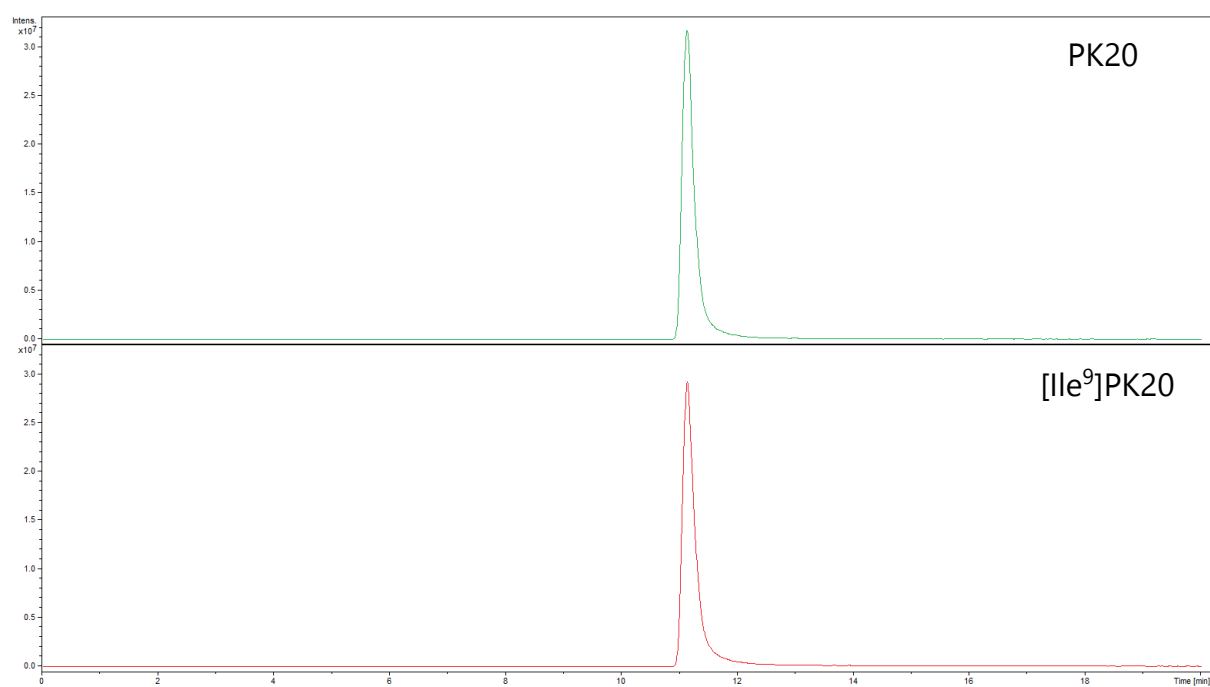

**Figure S2.** MS spectra recorded for PK20 (A) and [Ile<sup>9</sup>]PK20 (B).

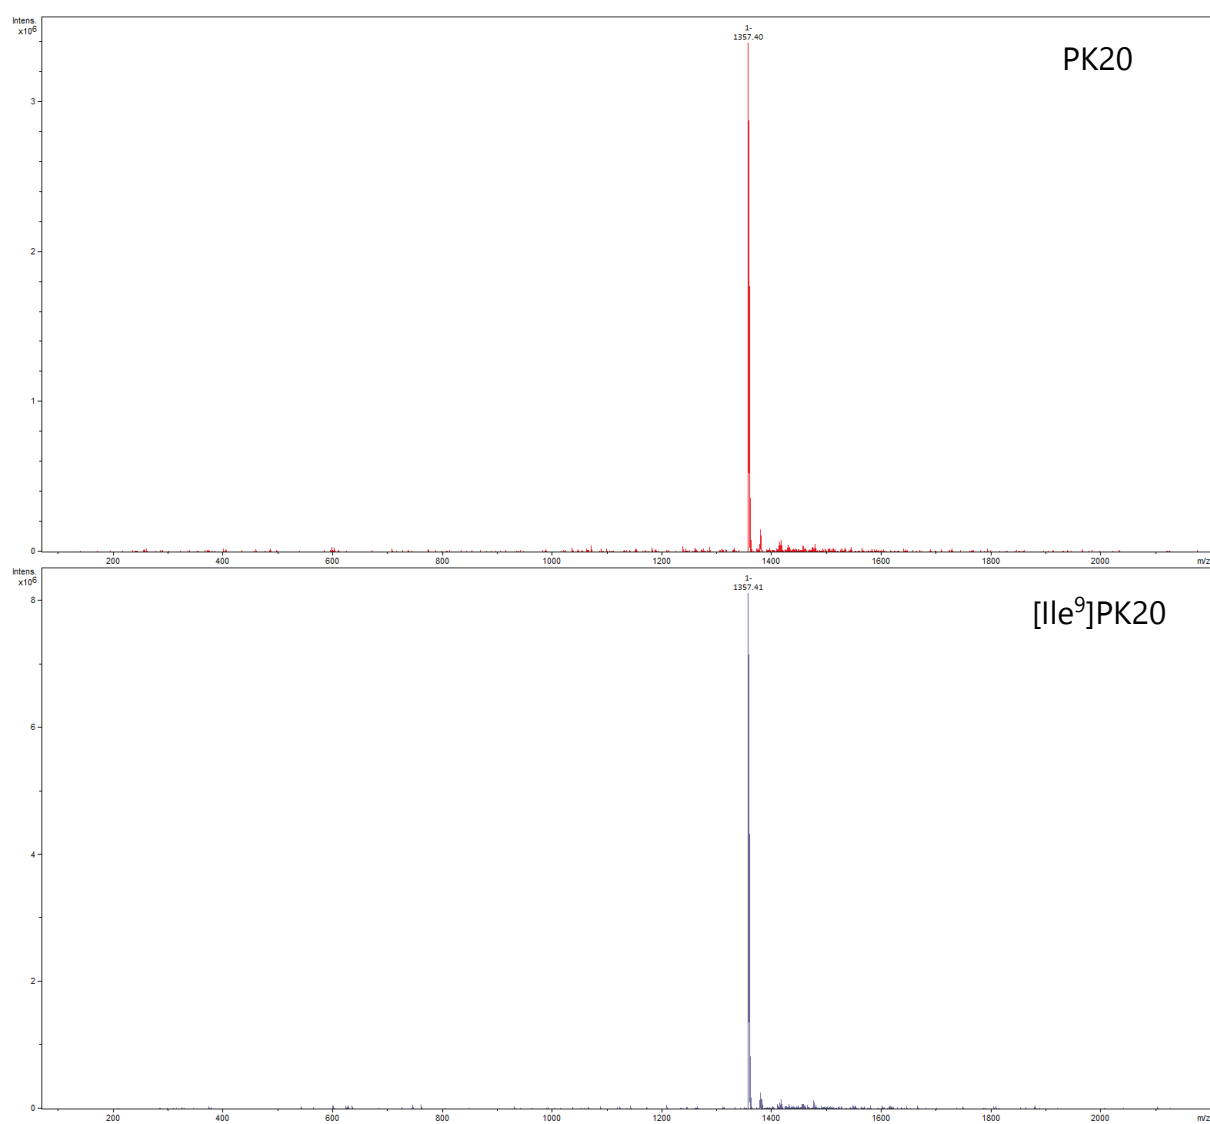

**Figure S3.** Calibration curves obtained for PK20 and [Ile<sup>9</sup>]PK20 as area for EIC ( $m/z = 1357.40 \pm 0.20$ ) vs. ng of the peptide injected to LC column.

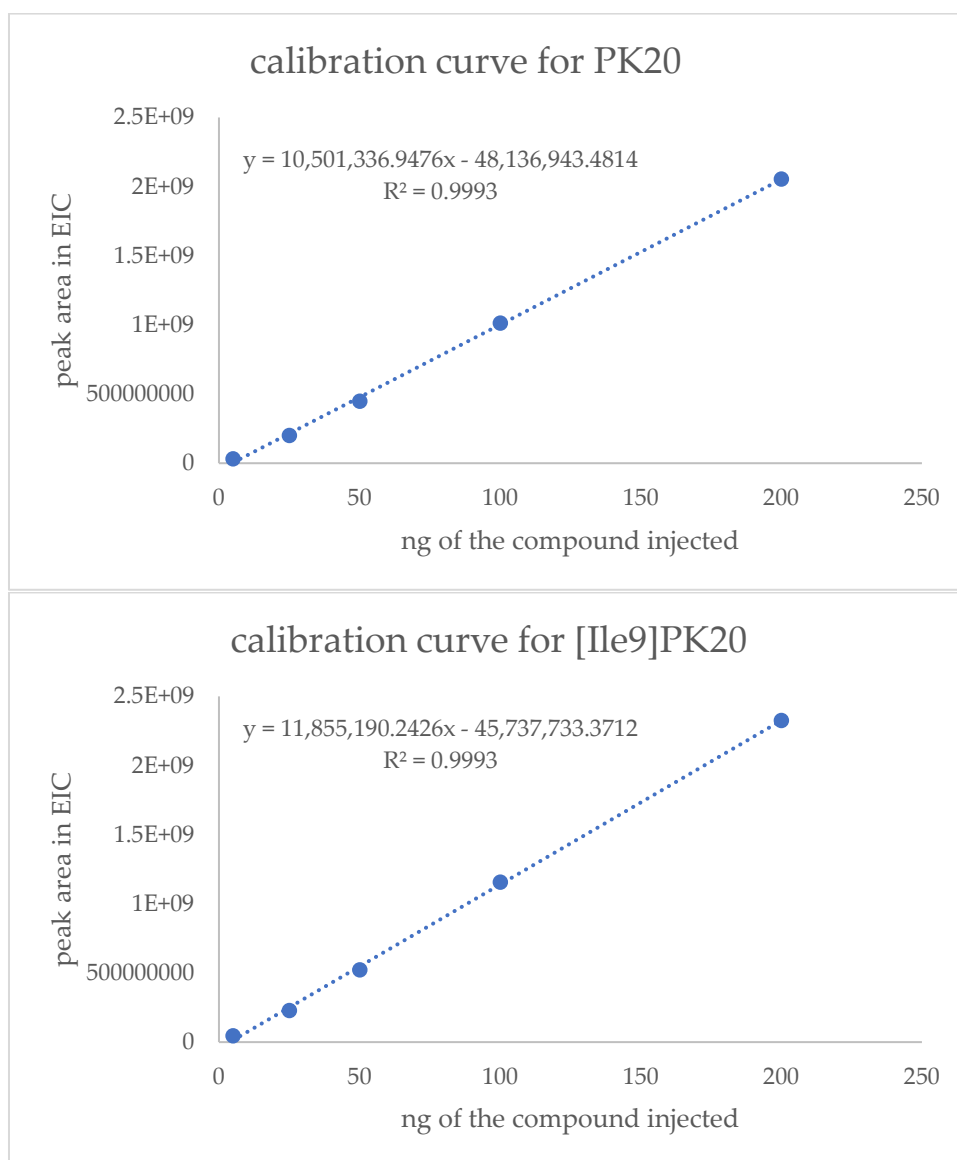

**Table S1.** Calibration and standard validation data for PK20 and [Ile<sup>9</sup>]PK20.

| Compound                | Linear range /ng per injection | Calibration curve equation         | Amount injected /ng | Intermediate precision /%CV | Recovery /% | LOD /ng per injection | LOQ /ng per injection |
|-------------------------|--------------------------------|------------------------------------|---------------------|-----------------------------|-------------|-----------------------|-----------------------|
| PK20                    | 5-200                          | $y = 10220837.313x - 32897298.173$ | 5                   | 3.63                        | 96.4 ± 0.7  | 2.92                  | 8.84                  |
|                         |                                |                                    | 25                  | 3.17                        |             |                       |                       |
|                         |                                |                                    | 50                  | 4.27                        | 102.1 ± 0.6 |                       |                       |
|                         |                                |                                    | 100                 | 4.34                        |             |                       |                       |
|                         |                                |                                    | 200                 | 1.73                        | 101.2 ± 0.5 |                       |                       |
| [Ile <sup>9</sup> ]PK20 | 5-200                          | $y = 11633076.337x - 33670205.577$ | 5                   | 1.79                        | 95.6 ± 0.4  | 2.54                  | 7.70                  |
|                         |                                |                                    | 25                  | 2.60                        |             |                       |                       |
|                         |                                |                                    | 50                  | 0.77                        | 99.4 ± 0.7  |                       |                       |
|                         |                                |                                    | 100                 | 2.12                        |             |                       |                       |
|                         |                                |                                    | 200                 | 2.77                        | 101.3 ± 0.3 |                       |                       |
